# Supplementary material for: Rationally designed hierarchical hollow CuS/CdIn2S4 heterostructure nanoboxes for boosted photoreduction of CO2
Source: Royal Society of Chemistry journal article supplement (doi:10.1039/d4nr03104k), 2024-01-01
Supplement: d4nr03104k1.pdf [file d4nr03104k1.pdf]

## Supporting Information

### **Rationally-Designed Hierarchical Hollow CuS/CdIn<sub>2</sub>S<sub>4</sub> Heterostructure Nanoboxes for Boosted Photoreduction of CO<sub>2</sub>**

*Wentao Hou,<sup>a</sup> Puyue Xia,<sup>a</sup> Chen Zhuang,<sup>a</sup> Qi Liu,<sup>\*,b</sup> Tingting Cheng,<sup>a</sup> Yubin Zheng,<sup>a</sup>*

*YanJun Zhu,<sup>a</sup> Yiqing Wei,<sup>a</sup> Haoqiang Chi,<sup>a</sup> Yong Zhou,<sup>\*,a,c</sup> Zhigang Zou<sup>a,c</sup>*

<sup>a</sup> Key Laboratory of Modern Acoustics (MOE), Institute of Acoustics, School of Physics, Jiangsu Key Laboratory of Nanotechnology, Eco-materials and Renewable Energy Research Center (ERERC), National Laboratory of Solid-State Microstructures, Collaborative Innovation Center of Advanced Microstructures, Nanjing University, Nanjing, Jiangsu 210093, P. R. China

<sup>b</sup> School of Chemical and Environmental Engineering, School of Materials Science and Engineering, Anhui Polytechnic University, Wuhu 241000, P. R. China.

<sup>c</sup> School of Science and Engineering, The Chinese University of Hong Kong (Shenzhen), Shenzhen 518172, P. R. China;

\* Correspondence: zhouyong1999@nju.edu.cn; modieer\_67@ahpu.edu.cn

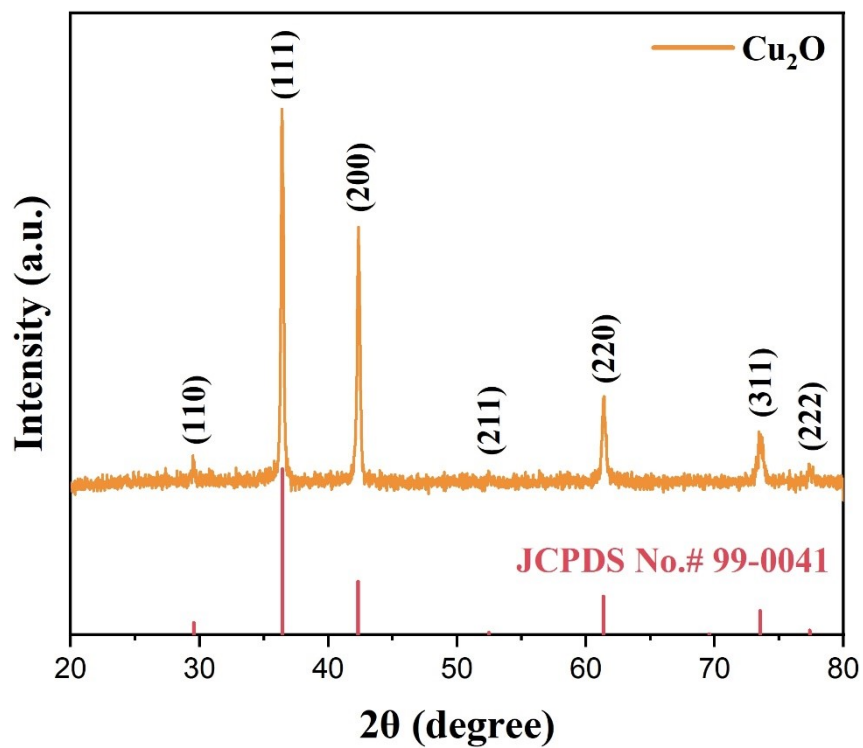

Fig. S1. XRD pattern of Cu<sub>2</sub>O nanocubes.

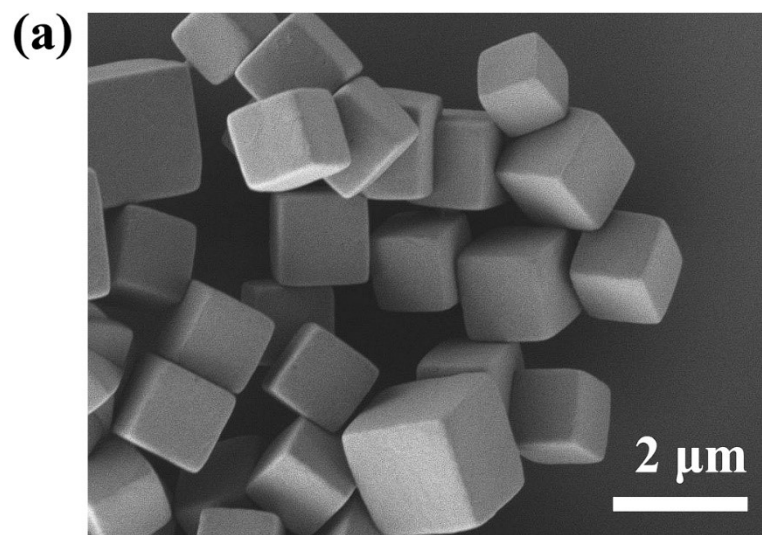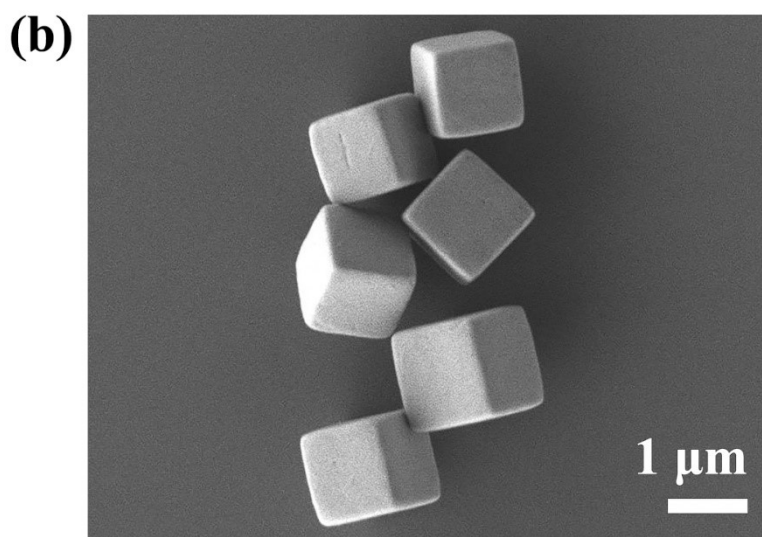

**Fig. S2.** (a-b) SEM images of Cu<sub>2</sub>O nanocubes.

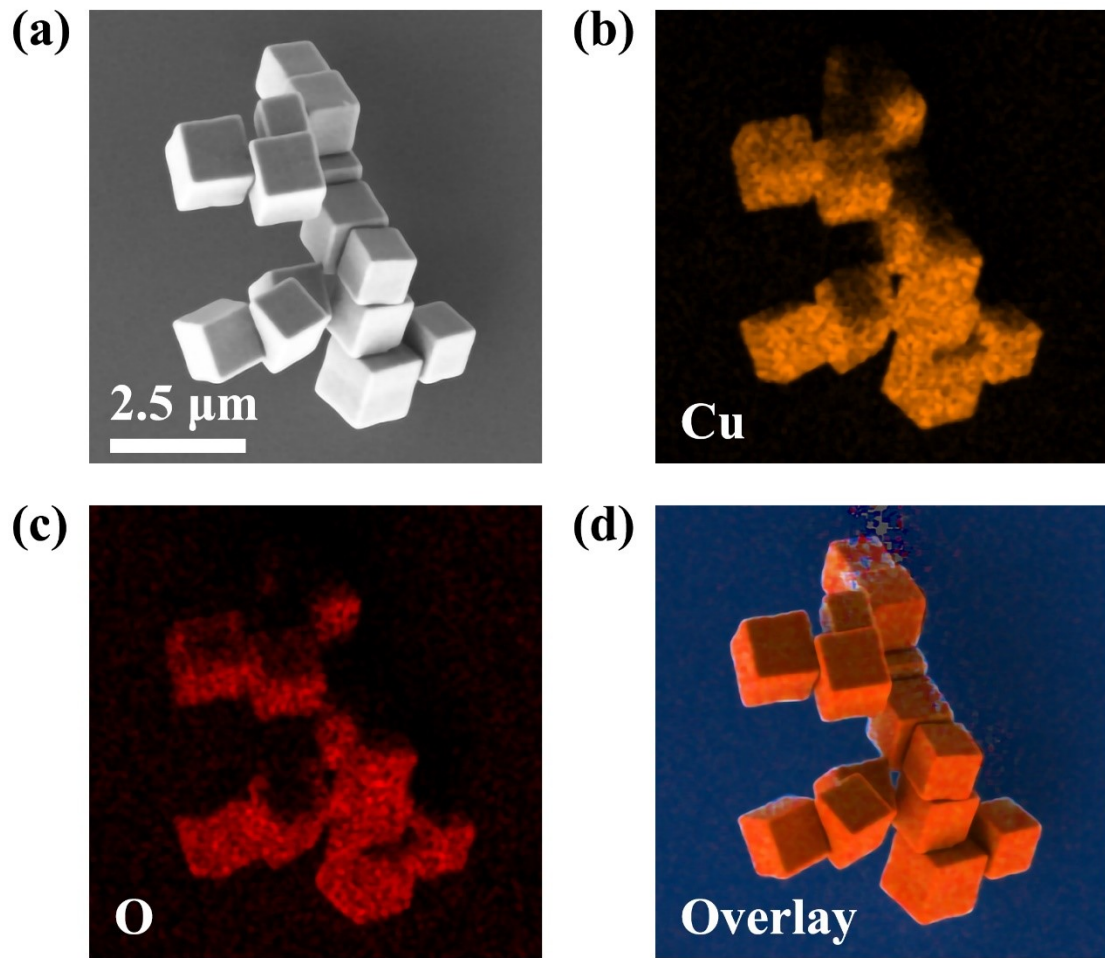

Fig. S3. EDX elemental mapping of Cu<sub>2</sub>O nanocubes.

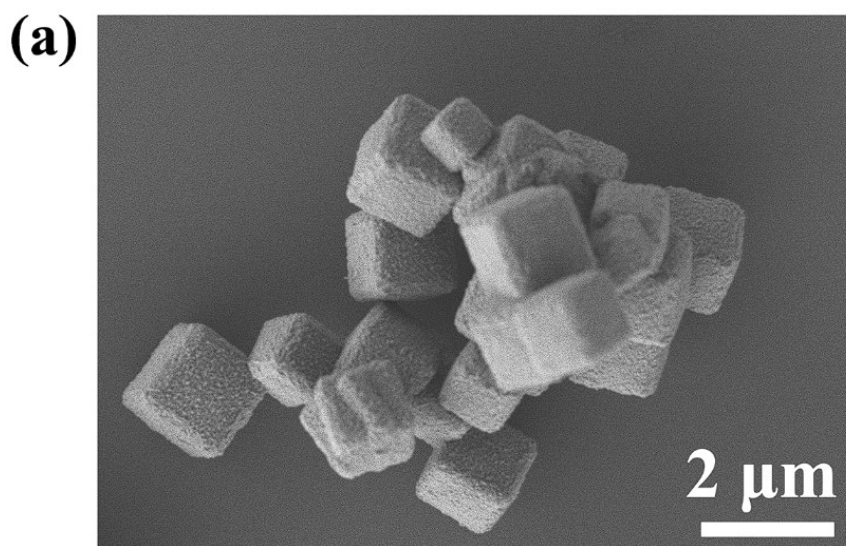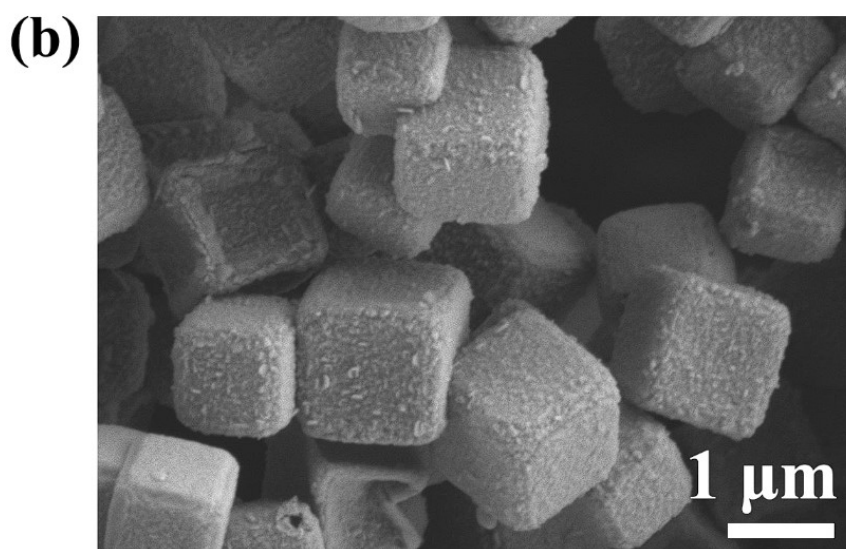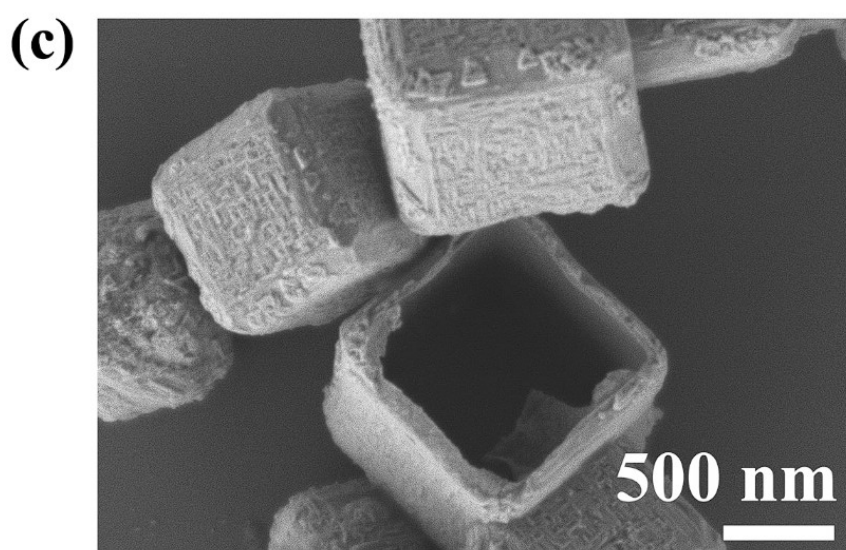

**Fig. S4.** (a-c) SEM images of CuS nanoboxes.

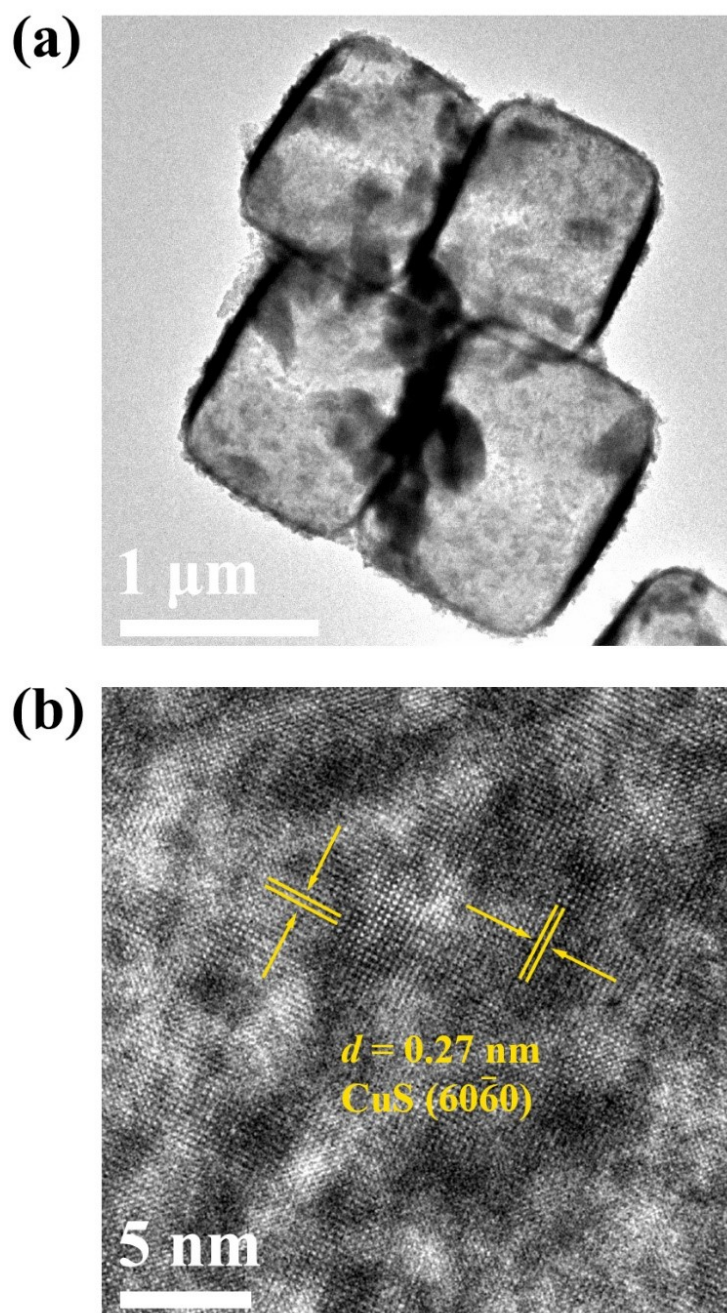

**Fig. S5.** (a) TEM and (b) HRTEM images of CuS nanoboxes.

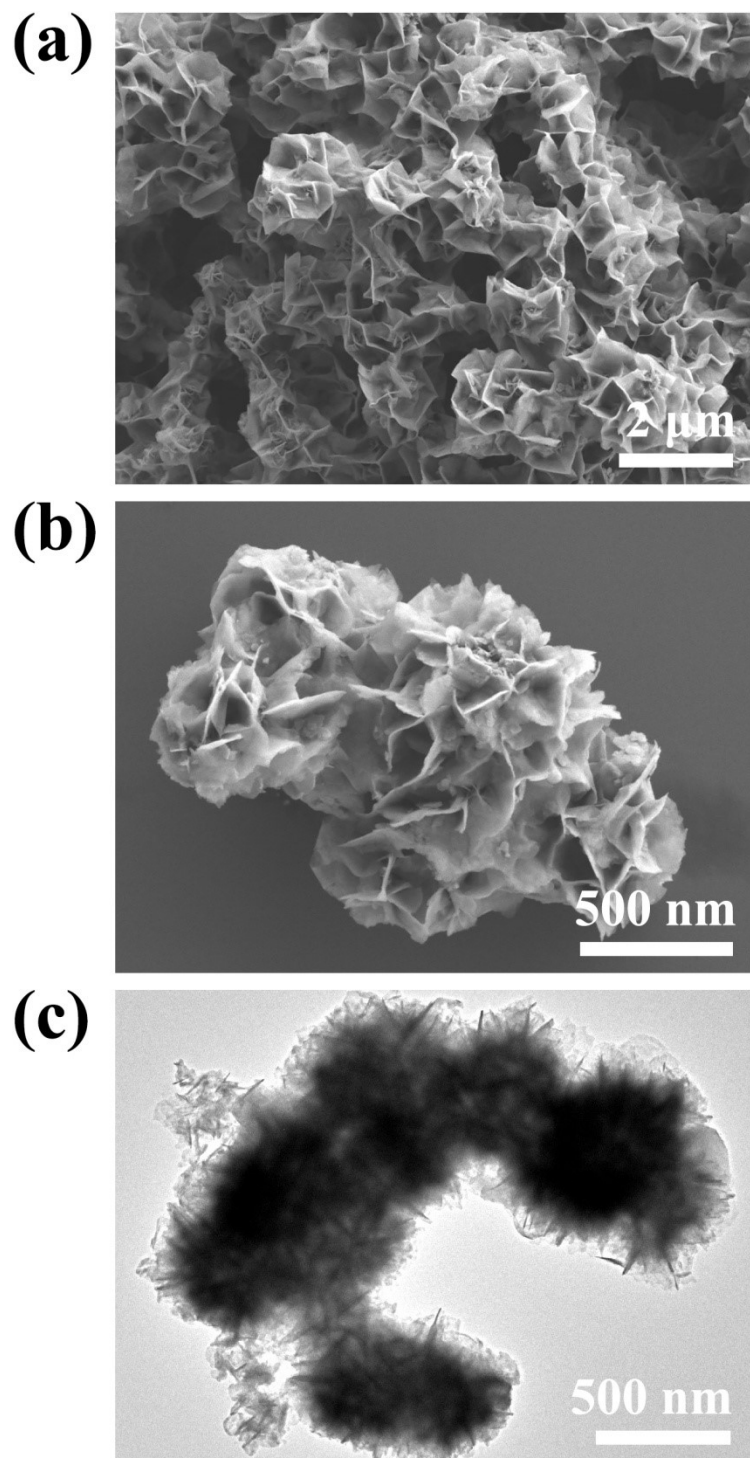

**Fig. S6.** (a-b) SEM and (c) HRTEM images of pristine CdIn<sub>2</sub>S<sub>4</sub>.

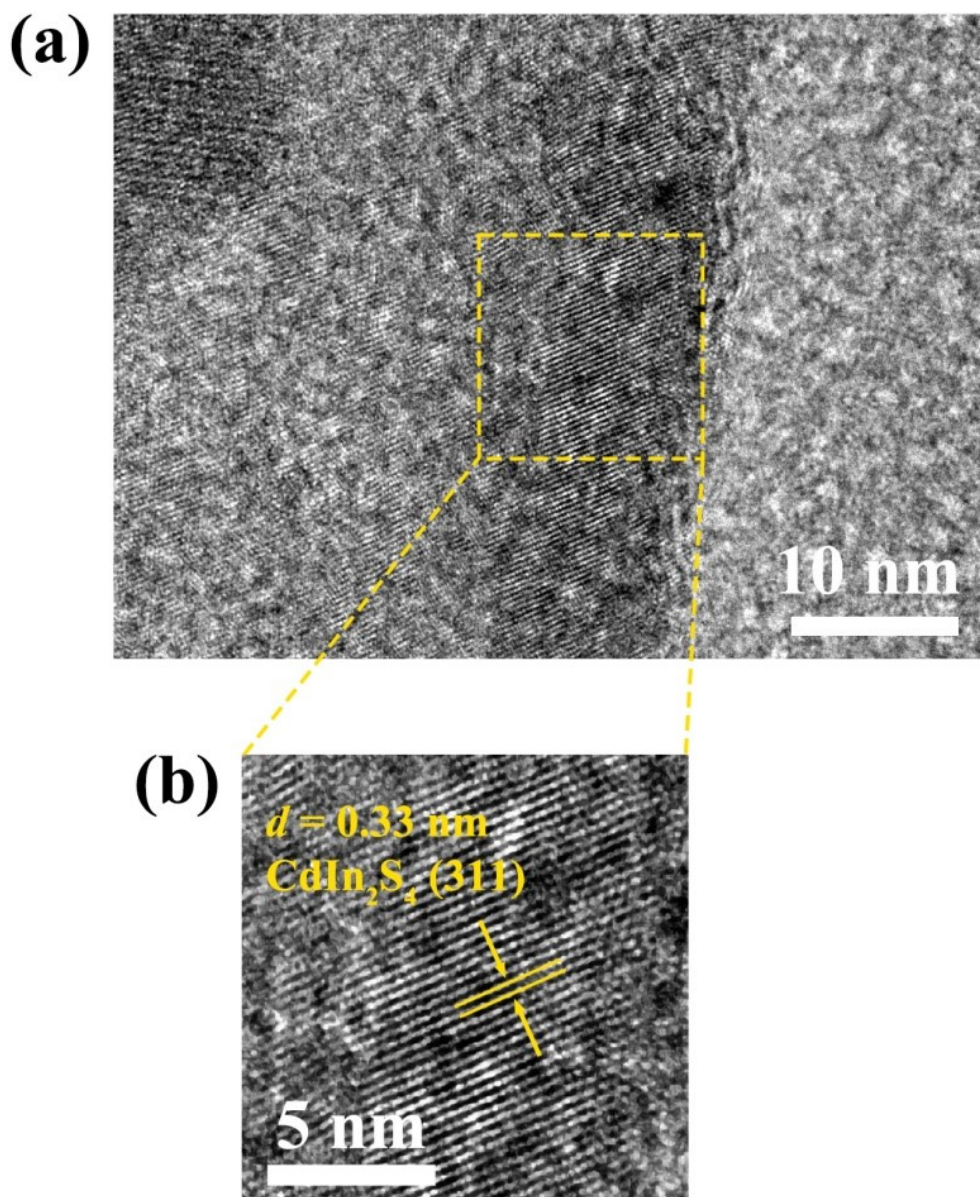

**Fig. S7.** (a-b) HRTEM images of pristine CdIn<sub>2</sub>S<sub>4</sub>.



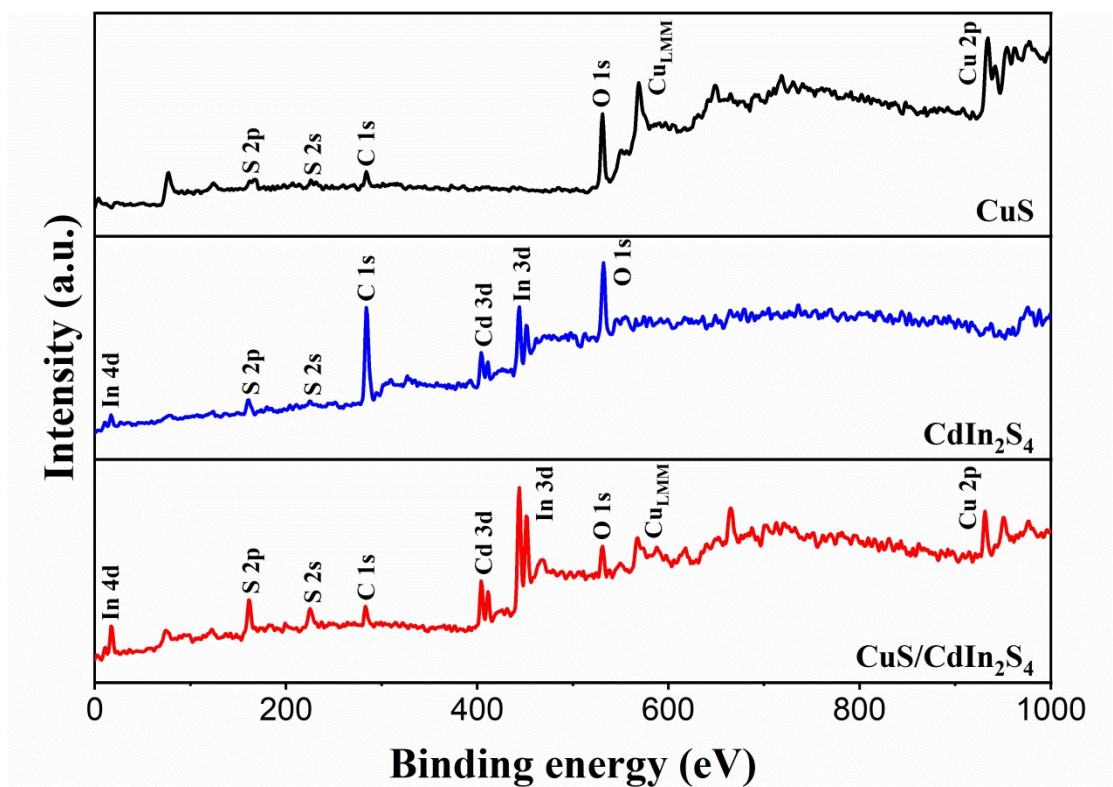

Fig. S8. XPS Surveys of CuS, CdIn<sub>2</sub>S<sub>4</sub> and CuS/CdIn<sub>2</sub>S<sub>4</sub>.

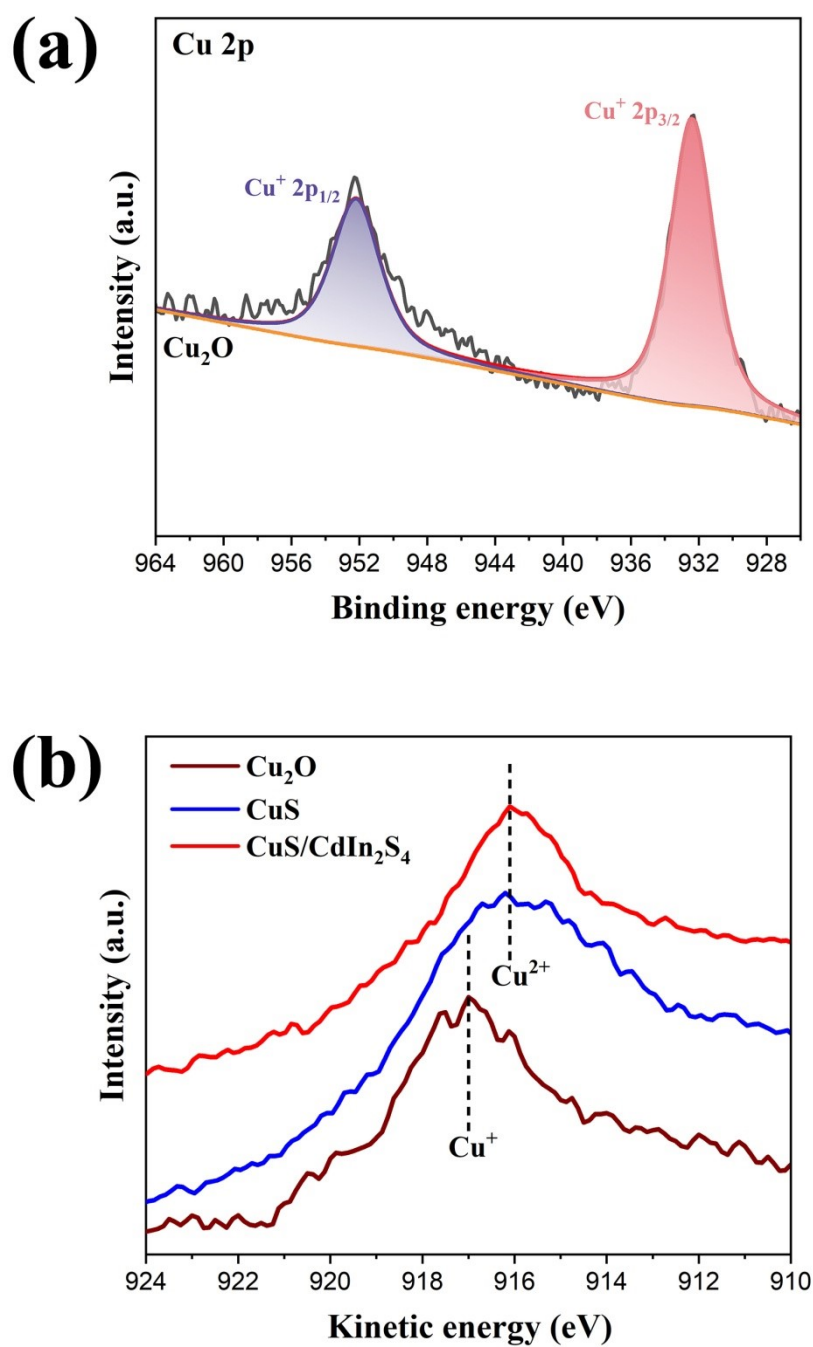

**Fig. S9.** (a) Cu 2p XPS spectrum of Cu<sub>2</sub>O; (b) Cu-LMM Auger spectra of Cu<sub>2</sub>O, CuS and CuS/CdIn<sub>2</sub>S<sub>4</sub>.

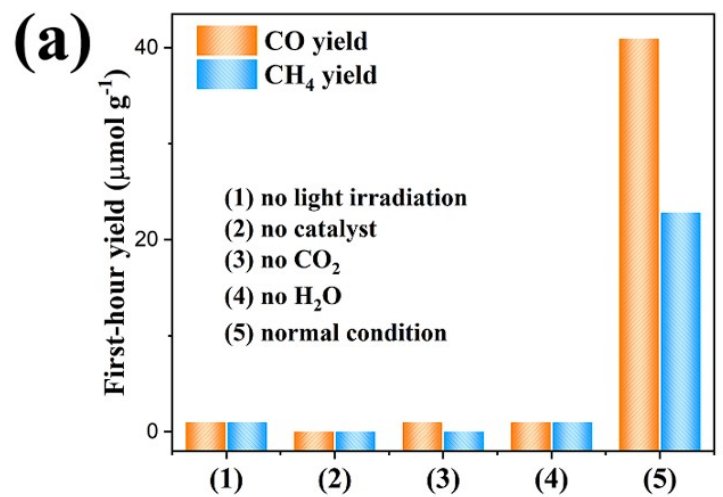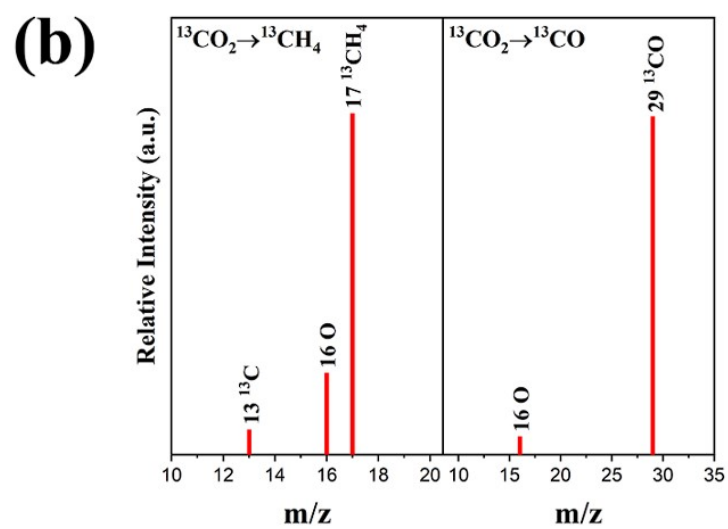

**Fig. S10.** (a) Blank experiments and (b)  $^{13}\text{CO}_2$  isotopic mapping of CuS/CdIn<sub>2</sub>S<sub>4</sub>.

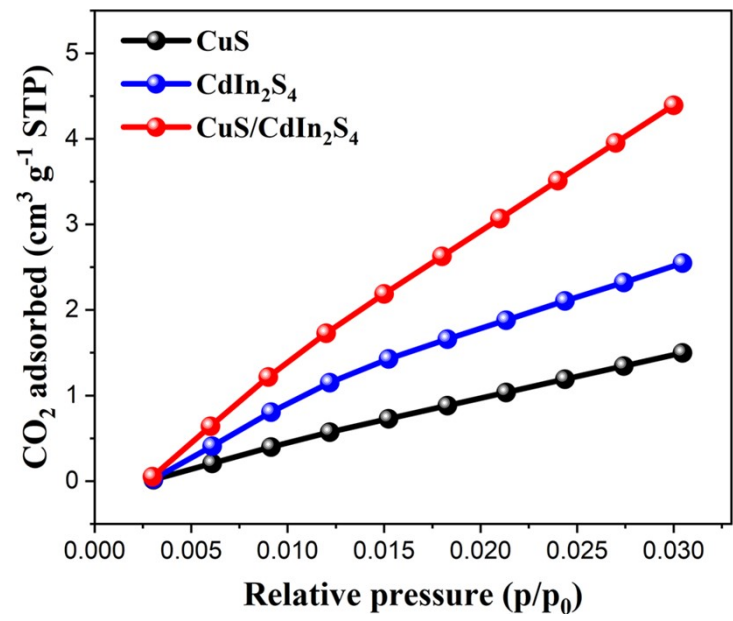

**Fig. S11.** CO<sub>2</sub> adsorption isotherms of CuS, CdIn<sub>2</sub>S<sub>4</sub> and CuS/CdIn<sub>2</sub>S<sub>4</sub> (at 0°C).

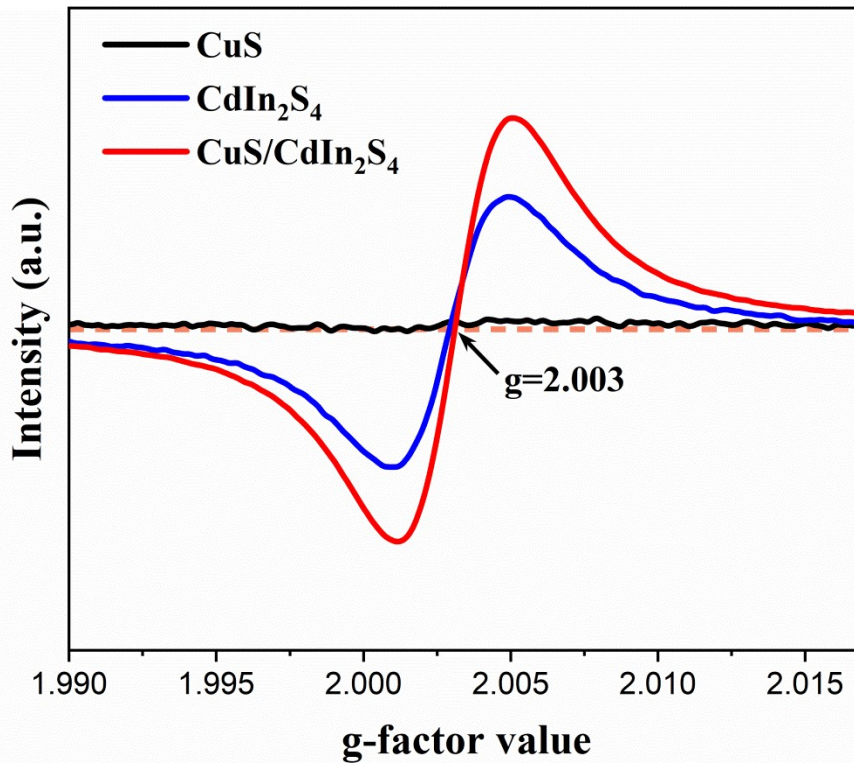

**Fig. S12.** Electron paramagnetic resonance spectra of CuS, CdIn<sub>2</sub>S<sub>4</sub> and CuS/CdIn<sub>2</sub>S<sub>4</sub>.

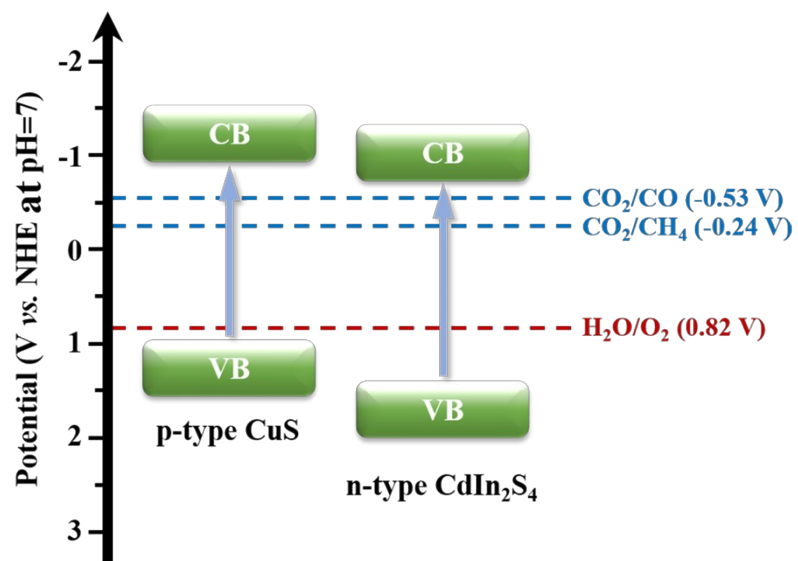

Fig. S13. Band alignment of CuS and CdIn<sub>2</sub>S<sub>4</sub>.

**Table. S1.** Element mass ratio of CuS/CdIn<sub>2</sub>S<sub>4</sub> heterostructures measured by inductively coupled plasma mass spectrometry (ICP-MS)

| Element            | Cu   | Cd   | In   | S    |
|--------------------|------|------|------|------|
| Weight ratio (wt%) | 20.4 | 15.8 | 32.7 | 30.8 |

**Table. S2.** Photocatalysis performance comparison between CuS/CdIn<sub>2</sub>S<sub>4</sub> heterostructures and recently reported CuS- or CdIn<sub>2</sub>S<sub>4</sub>- based materials.

| Catalyst                                             | Reaction condition                                                                     | Average yield                                                                                                     | Ref.      |
|------------------------------------------------------|----------------------------------------------------------------------------------------|-------------------------------------------------------------------------------------------------------------------|-----------|
| Cu <sub>2</sub> S/CuS NRs                            | CO <sub>2</sub> +H <sub>2</sub> O<br>Newport solar simulator<br>AM 1.5 sunlight        | CH <sub>4</sub> (38 μmol m <sup>-2</sup> h <sup>-1</sup> )                                                        | [1]       |
| CuS <sub>x</sub> -TiO <sub>2</sub>                   | CO <sub>2</sub> +H <sub>2</sub> O<br>6.0 W cm <sup>-2</sup> mercury lamp<br>λ = 365 nm | CH <sub>4</sub> (6.65 μmol g <sup>-1</sup> h <sup>-1</sup> )                                                      | [2]       |
| Cu <sub>1.95</sub> S@CuS                             | CO <sub>2</sub> +H <sub>2</sub> O<br>300 W Xe lamp<br>AM 1.5G filter                   | CO (28.65 μmol g <sup>-1</sup> h <sup>-1</sup> )                                                                  | [3]       |
| Cu-Cu <sub>2</sub> O-CuS                             | CO <sub>2</sub> +H <sub>2</sub> O<br>300 W Xe lamp<br>(400 nm ≤ λ ≤ 1100 nm)           | CO (22.6 μmol g <sup>-1</sup> h <sup>-1</sup> )<br>CH <sub>4</sub> (3.06 μmol g <sup>-1</sup> h <sup>-1</sup> )   | [4]       |
| CdIn <sub>2</sub> S <sub>4</sub> /TiO <sub>2</sub>   | CO <sub>2</sub> +H <sub>2</sub> O<br>300 W Xe lamp                                     | CO (18.32 μmol g <sup>-1</sup> h <sup>-1</sup> )<br>CH <sub>4</sub> (1.03 μmol g <sup>-1</sup> h <sup>-1</sup> )  | [5]       |
| WO <sub>3</sub> QDs/CdIn <sub>2</sub> S <sub>4</sub> | CO <sub>2</sub> +H <sub>2</sub> O<br>300 W Xe lamp<br>420 nm cut-off filter            | CO (8.2 μmol g <sup>-1</sup> h <sup>-1</sup> )<br>CH <sub>4</sub> (1.6 μmol g <sup>-1</sup> h <sup>-1</sup> )     | [6]       |
| CdIn <sub>2</sub> S <sub>4</sub> /Au/rGO             | CO <sub>2</sub> +H <sub>2</sub> O+TEOA<br>300 W Xe lamp                                | CO (19.3 μmol g <sup>-1</sup> h <sup>-1</sup> )<br>CH <sub>4</sub> (5.4 μmol g <sup>-1</sup> h <sup>-1</sup> )    | [7]       |
| CuS/CdIn <sub>2</sub> S <sub>4</sub>                 | CO <sub>2</sub> +H <sub>2</sub> O<br>300 W Xe lamp                                     | CO (33.28 μmol g <sup>-1</sup> h <sup>-1</sup> )<br>CH <sub>4</sub> (14.61 μmol g <sup>-1</sup> h <sup>-1</sup> ) | This work |

## References

- [1] P. Kar, S. Farsinezhad, X. Zhang and K. Shankar, *Nanoscale*, 2014, **6**, 14305-14318.
- [2] H. Lee, B. S. Kwak, N.-K. Park, J.-I. Baek, H.-J. Ryu and M. Kang, *Appl. Surf. Sci.*, 2017, **393**, 385-396.
- [3] X. Shi, L. Wang, W. Dai, X. Dong, Y. Bai, and L. Ye, *ACS Catal.*, 2023, **13**, 5264-5271
- [4] Y. Chen, Y. Ding, W. Han, W. Li, X. Yu, G. Tian, *J. Mater. Chem. A*, 2023, **11**, 8342-8351.
- [5] X. Ma, L. Wang, H. She, Y. Zhou, L. Wang, Huang, J. Huang, and Q. Wang, *Front. Chem. Sci. Eng.*, 2024, **18**, 105.
- [6] Z. Zhang, Y. Cao, F. Zhang, W. Li, Y. Li, H. Yu, M. Wang and H. Yu, *Chem. Eng. J.*, 2022, **428**, 131218.
- [7] X. Li, H. Jiang, C. Ma, Zhi. Z, X. Song, X. Li, H. Wang, P. Huo, X. Chen, *J. Mater. Chem. A*, 2020, **8**, 18707-18714.
